# Supplementary material for: Strapping a benzaldehyde-appended 2,2′-bis-dipyrrin Zn(ii) double-stranded helicate using imine bond formation
Source: Royal Society of Chemistry journal article supplement (doi:10.1039/c9dt00377k), 2019-01-01
Supplement: c9dt00377k1.pdf [file c9dt00377k1.pdf]

## Electronic Supplementary Information

### Strapping a benzaldehyde-appended 2,2'-bis-dipyrrin Zn(II) double-stranded helicate using imine bond formation

Fan Zhang, Audrey Fluck, Stéphane A. Baudron\* and Mir Wais Hosseini\*

Laboratoire de Tectonique Moléculaire, UMR UdS-CNRS 7140, icFRC

Institut Le Bel, Université de Strasbourg

4 rue Blaise Pascal, CS 90032, F-67081 Strasbourg cedex, France

Fax: (+) 33 3 68 85 13 25

E-mail: [hosseini@unistra.fr](mailto:hosseini@unistra.fr) ; [sbaudron@unistra.fr](mailto:sbaudron@unistra.fr)

#### Synthesis

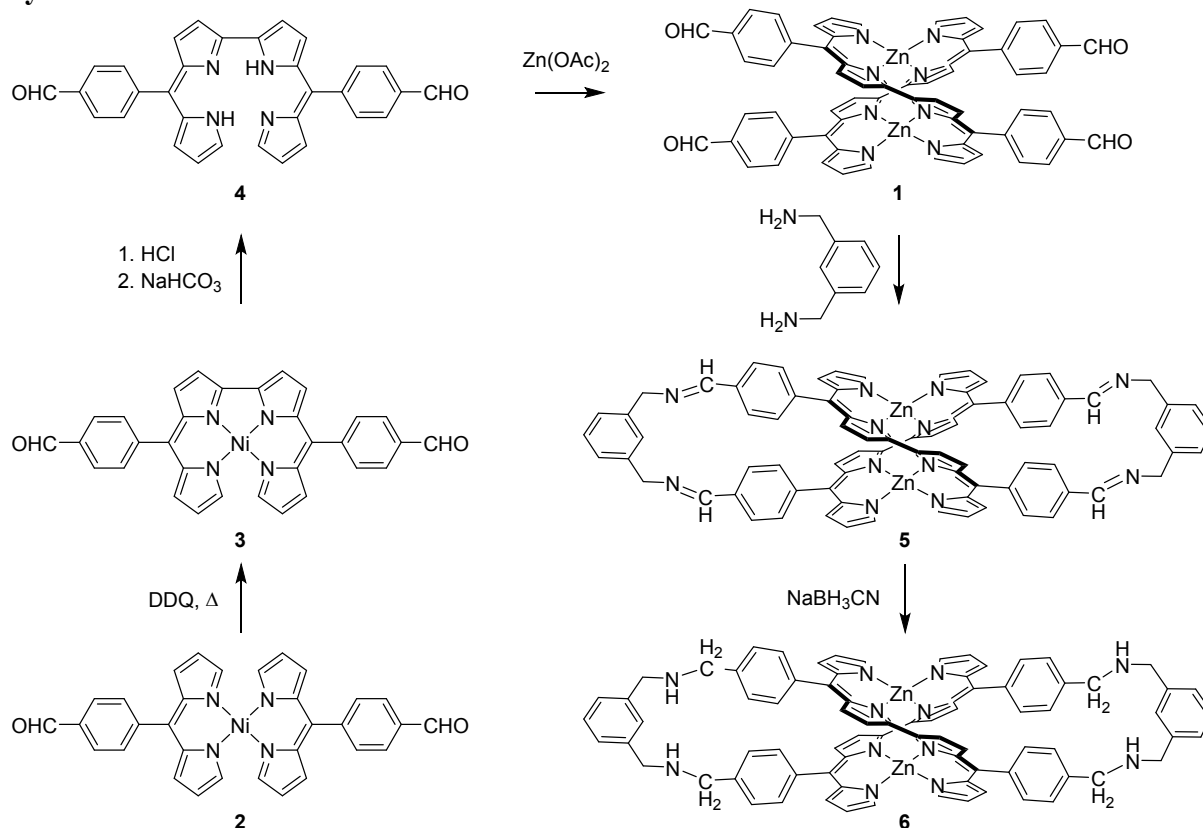

5-(4-formylphenyl)dipyrrin was synthesized as described.<sup>1</sup> <sup>1</sup>H and <sup>13</sup>C NMR spectra were recorded at 25 °C on a Bruker AV500 (500 MHz) or AV400 (400 MHz) with the deuterated solvent as the internal reference. NMR chemical shifts and *J* values are given in parts per million (ppm) and in Hertz, respectively. Mass spectrometry was performed by the Service commun d'analyse (University of Strasbourg).

**Complex 2:** To a  $\text{CHCl}_3$  (50 mL) solution of 5-(4-formylphenyl)dipyrin (0.83 g; 3.34 mmol), a MeOH (50 mL) solution of  $\text{Ni}(\text{OAc})_2 \cdot 4\text{H}_2\text{O}$  (0.42 g; 1.67 mmol) was added. The mixture was stirred at room temperature overnight. It was then evaporated under reduced pressure and the residue was washed with MeOH affording complex **2** as a dark red solid (0.76 g, 82%).  $\delta_{\text{H}}$  (400 MHz,  $\text{CDCl}_3$ ) 10.96 (s, 4H, pyrroleH), 10.10 (s, 2H, CHO), 8.30 (d,  $J = 2.5$  Hz, 4H, pyrroleH), 7.91 (d, 4H,  $J = 7.8$  Hz, PhH), 7.52 (d, 4H,  $J = 7.9$  Hz, PhH), 6.67 (s,  $J = 3.8$  Hz, 4H, pyrroleH).  $\delta_{\text{C}}$  (125 MHz,  $\text{CDCl}_3$ ) 191.8, 175.7, 149.2, 142.8, 141.6, 139.4, 136.9, 136.6, 131.2, 128.8. Single crystals were obtained by *n*-pentane vapor diffusion into a THF solution of the complex.

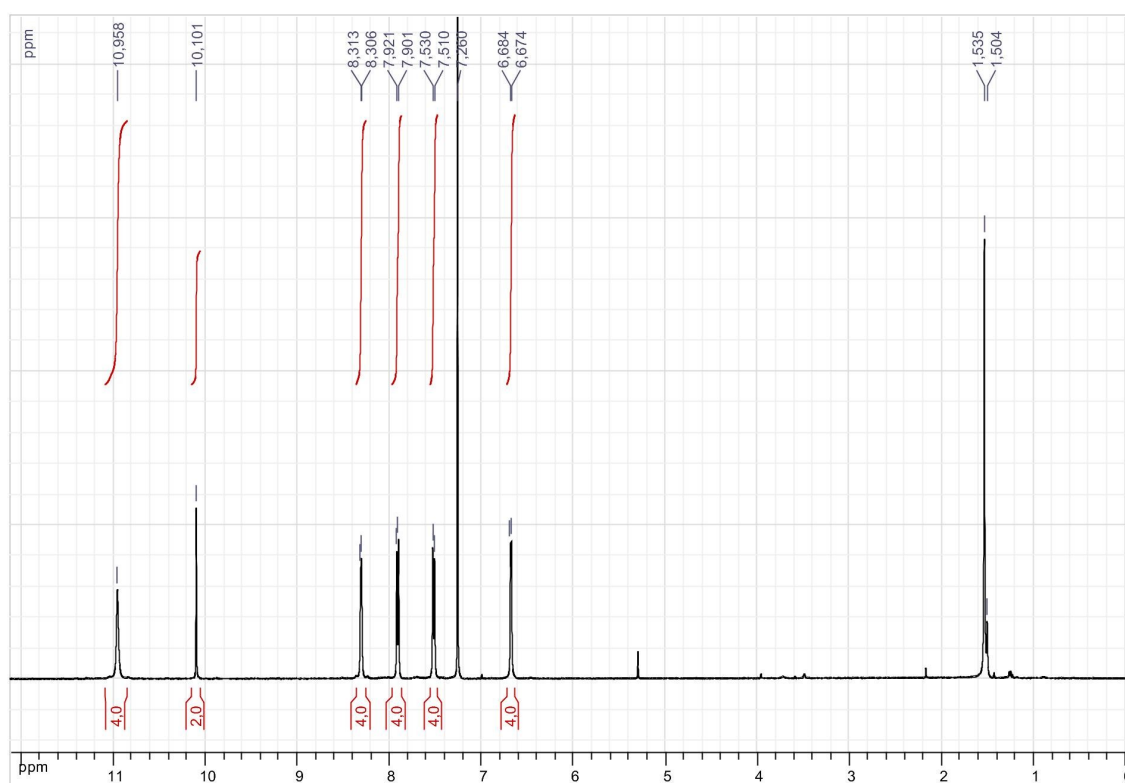

**Fig. ESI1**  $^1\text{H-NMR}$  spectrum of complex **2** in  $\text{CDCl}_3$ .

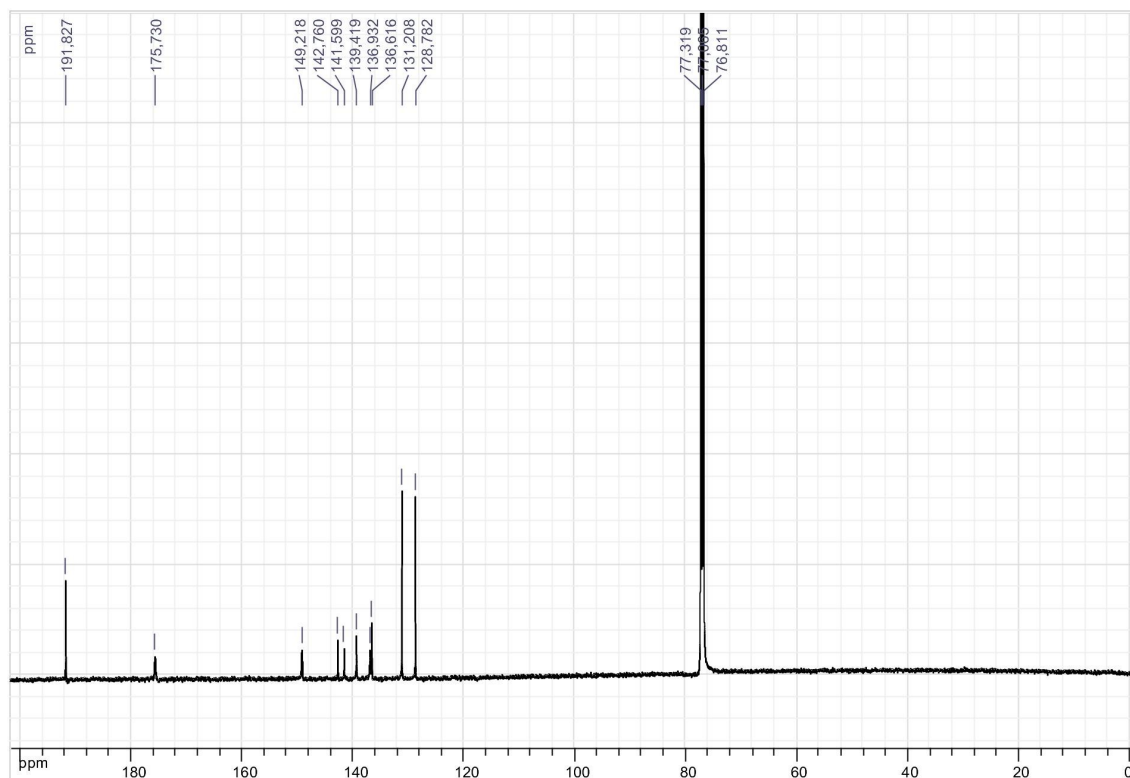

**Fig. ESI2**  $^{13}\text{C}$ -NMR spectrum of complex **2** in  $\text{CDCl}_3$ .

**Complex 3:** A toluene (150 mL) solution of DDQ (0.34 g; 1.49 mmol) was added dropwise to a toluene (200 mL) solution of complex **2** (0.75 g; 1.36mmol). The color of the mixture turned from red to brown, upon heating at reflux for 24 hours. After evaporation under reduced pressure, the residue was purified by column chromatography ( $\text{SiO}_2$ ,  $\text{CH}_2\text{Cl}_2/\text{Cyclohexane}$ : 9/1) affording the desired compound **3** as a red solid (0.6 g, 80%).  $\delta_{\text{H}}$  (500 MHz,  $\text{CDCl}_3$ ) 10.14 (s, 2H, CHO), 8.00 (d, 4H,  $J = 8.2$  Hz, PhH), 7.73 (d, 4H,  $J = 8.2$  Hz, PhH), 6.73 (d, 2H,  $J = 4.7$  Hz, pyrroleH), 6.68 (d, 2H,  $J = 4.4$  Hz, pyrroleH), 6.65 (d, 2H,  $J = 4.4$  Hz, pyrroleH), 6.46 (d, 2H,  $J = 4.7$  Hz, pyrroleH), 5.94 (s, 2H, pyrroleH).  $\delta_{\text{C}}$  (125 MHz,  $\text{CDCl}_3$ ) 191.9, 161.9, 154.1, 142.9, 141.7, 138.6, 136.7, 135.5, 134.7, 131.6, 130.0, 129.1, 117.8, 116.0.  $\lambda_{\text{max}}(\text{CH}_2\text{Cl}_2)/\text{nm}$  ( $\epsilon/\text{mol}^{-1}\cdot\text{L}\cdot\text{cm}^{-1}$ ) 302 (22700), 355 (24200), 418 (35400), 573 (12900), 775 (5600).: HRMS (ESI),  $m/z$ :  $[\text{M}]^+$  calcd. for  $\text{C}_{32}\text{H}_{20}\text{N}_4\text{NiO}_2$ : 550.0934, Found 550.0947.

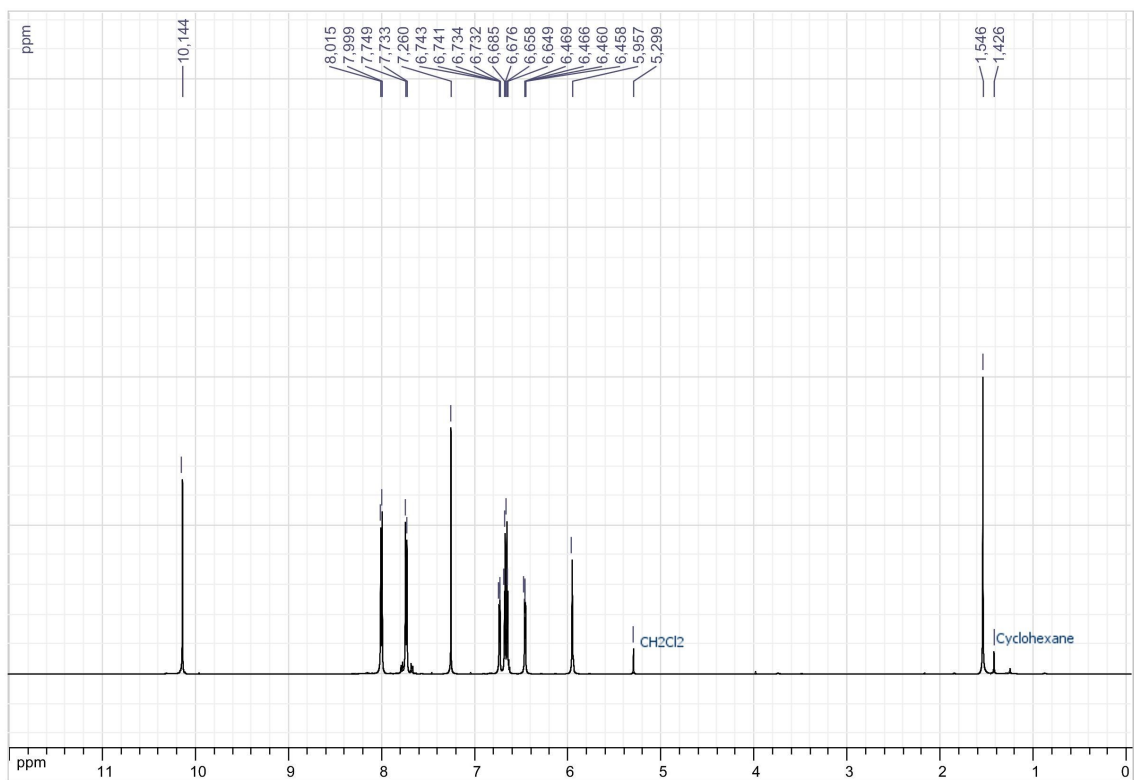

**Fig. ESI3**  $^1\text{H-NMR}$  spectrum of complex **3** in  $\text{CDCl}_3$ .

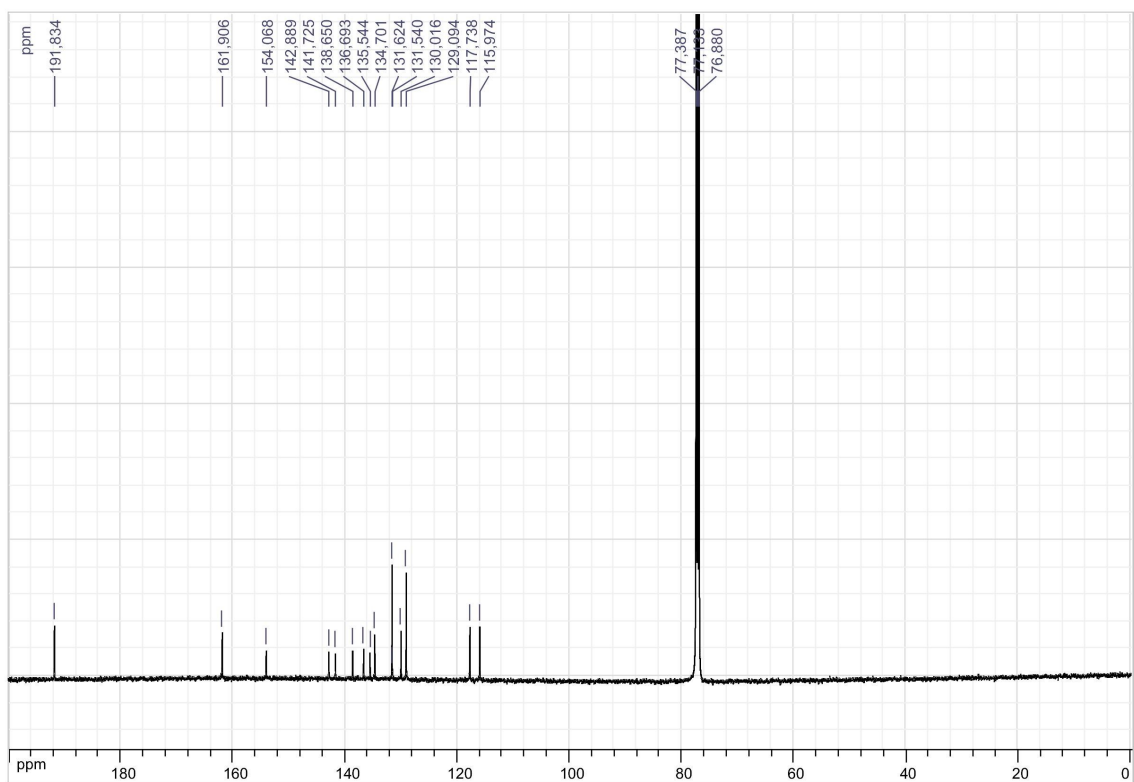

**Fig. ESI4**  $^{13}\text{C-NMR}$  spectrum of complex **3** in  $\text{CDCl}_3$ .

2,2'-bisdipyrrin **4**: A 12 M solution of HCl (20 mL) was added to a CHCl<sub>3</sub> (80 mL) solution of complex **3** (0.56 g; 1.02 mmol) and the mixture was stirred at room temperature overnight. Upon addition of a saturated Na<sub>2</sub>CO<sub>3</sub> solution, the organic layer turned from green to dark blue. The mixture was extracted with CHCl<sub>3</sub> (3 × 100 mL) and the combined organic layers were dried over Na<sub>2</sub>SO<sub>4</sub>, filtered and evaporated affording 2,2'-bisdipyrrin **4** as a dark blue solid (0.5 g, 99%). Single crystals were obtained by slow evaporation of a solution of the complex in CHCl<sub>3</sub>.  $\delta_{\text{H}}$  (500 MHz, CDCl<sub>3</sub>) 10.14 (s, 2H, CHO), 8.01(d,  $J = 8.2$  Hz, 4H, PhH), 7.72 (d,  $J = 8.2$  Hz, 4H, PhH), 7.64 (s, 2H, pyrroleH), 7.02(d,  $J = 4.4$  Hz, 2H, pyrroleH), 6.68 (d,  $J = 4.4$  Hz, 2H, pyrroleH), 6.52 (d,  $J = 4.1$  Hz, 2H, pyrroleH), 6.44 (d,  $J = 4.1$  Hz, 2H, pyrroleH).  $\delta_{\text{C}}$  (125 MHz, CDCl<sub>3</sub>) 191.9, 153.1, 145.2, 143.5, 139.6, 139.0, 138.8, 136.6, 131.8, 131.7, 129.2, 126.5, 120.8, 116.7.  $\lambda_{\text{max}}$ (CH<sub>2</sub>Cl<sub>2</sub>)/nm ( $\epsilon$ /mol<sup>-1</sup>.L.cm<sup>-1</sup>): 258 (31300), 280 (26000), 332 (24300), 413 (22700), 591 (37600). HRMS (ESI),  $m/z$ : [M]<sup>+</sup> calcd. for C<sub>32</sub>H<sub>23</sub>N<sub>4</sub>O<sub>2</sub>: 495.1816, Found 495.1775.

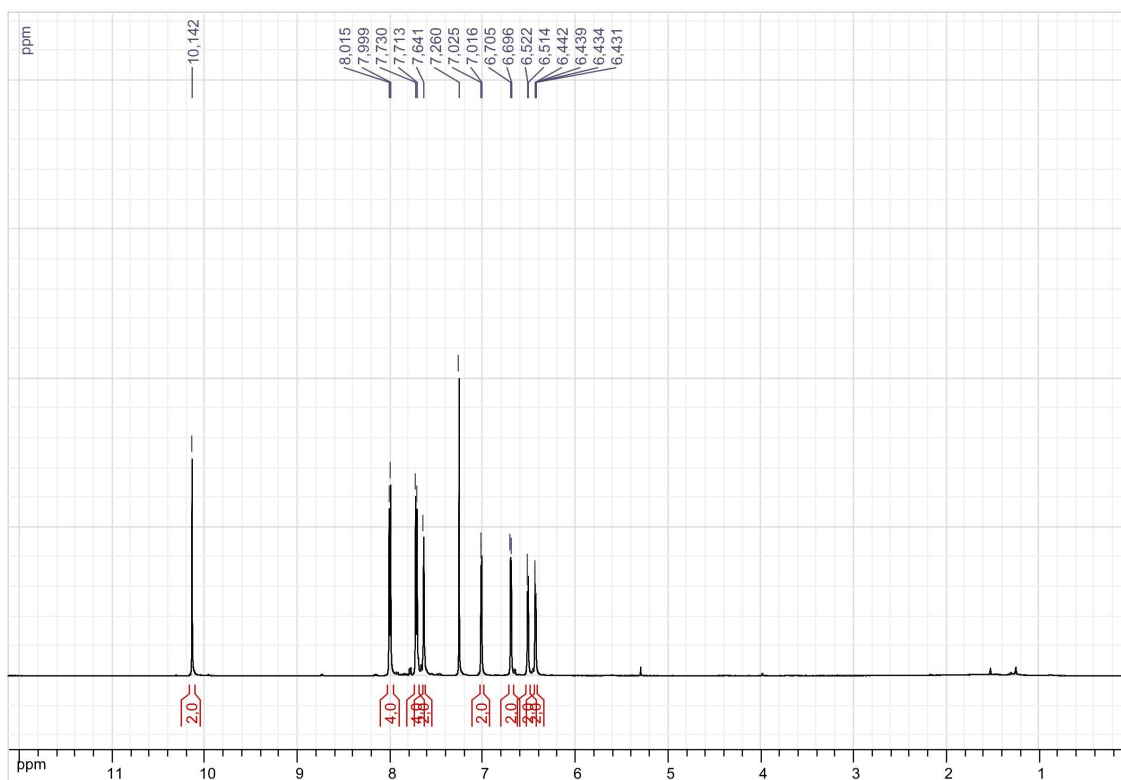

**Fig. ESI5** <sup>1</sup>H-NMR spectrum of 2,2'-bis-dipyrrin **4** in CDCl<sub>3</sub>.

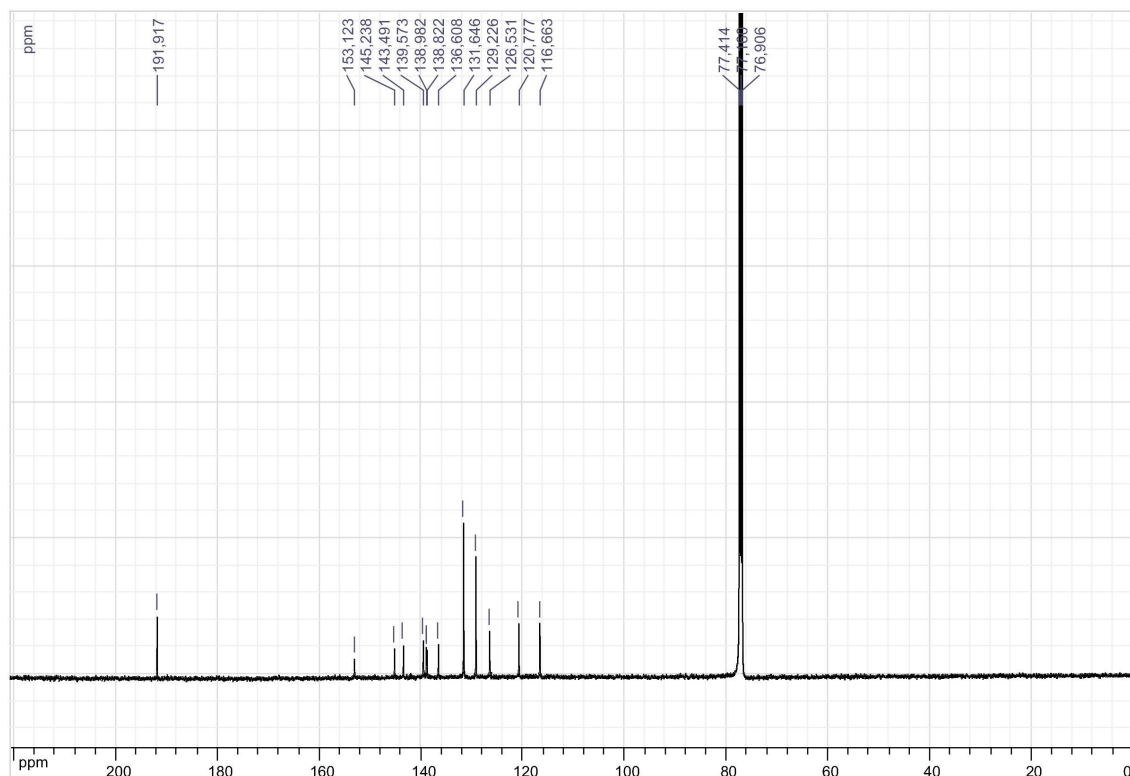

**Fig. ESI6**  $^{13}\text{C}$ -NMR spectrum of 2,2'-bis-dipyrin **4** in  $\text{CDCl}_3$ .

**Helicate 1:** A MeOH (60 mL) solution of  $\text{Zn}(\text{OAc})_2 \cdot 2\text{H}_2\text{O}$  (78 mg; 0.36 mmol) was added to a  $\text{CHCl}_3$  (60 mL) solution of ligand **4** (0.16 g; 0.32 mmol). Upon stirring for 24 hours at room temperature, the solution turned from dark blue to dark green. After evaporation under reduced pressure, the residue was washed with MeOH ( $3 \times 50$  mL) affording **helicate 1** (0.17 g, 94%).  $\delta_{\text{H}}$  (500 MHz,  $\text{CDCl}_3$ ) 10.13 (s, 4H, CHO), 7.95 (d, 4H,  $J = 7.8$  Hz, PhH), 7.75 (d, 4H,  $J = 7.8$  Hz, PhH), 7.66 (d, 4H,  $J = 7.8$  Hz, PhH), 7.22 (d, 4H,  $J = 7.8$  Hz, PhH), 6.98 (s, 4H, pyrroleH), 6.51 (d,  $J = 4.3$  Hz, 4H, pyrroleH), 6.44 (d,  $J = 4.1$  Hz, 4H, pyrroleH), 6.35 (d,  $J = 4.1$  Hz, 4H, pyrroleH), 6.31 (d,  $J = 4.3$  Hz, 4H, pyrroleH).  $\delta_{\text{C}}$  (125 MHz,  $\text{CDCl}_3$ ) 191.9, 154.9, 150.4, 145.4, 144.8, 141.6, 140.9, 136.5, 132.9, 132.2, 132.2, 131.7, 128.7, 128.4, 118.4, 117.3.  $\lambda_{\text{max}}(\text{CH}_2\text{Cl}_2)/\text{nm}$  ( $\epsilon/\text{mol}^{-1} \text{L cm}^{-1}$ ): 257 (71700), 284 (60800), 345 (60000), 432 (110200), 646 (66000). HRMS (ESI),  $m/z$ :  $[\text{M}]^+$  calcd. for  $\text{C}_{64}\text{H}_{40}\text{N}_8\text{O}_4\text{Zn}_2$ : 1112.1750, Found 1112.1804.

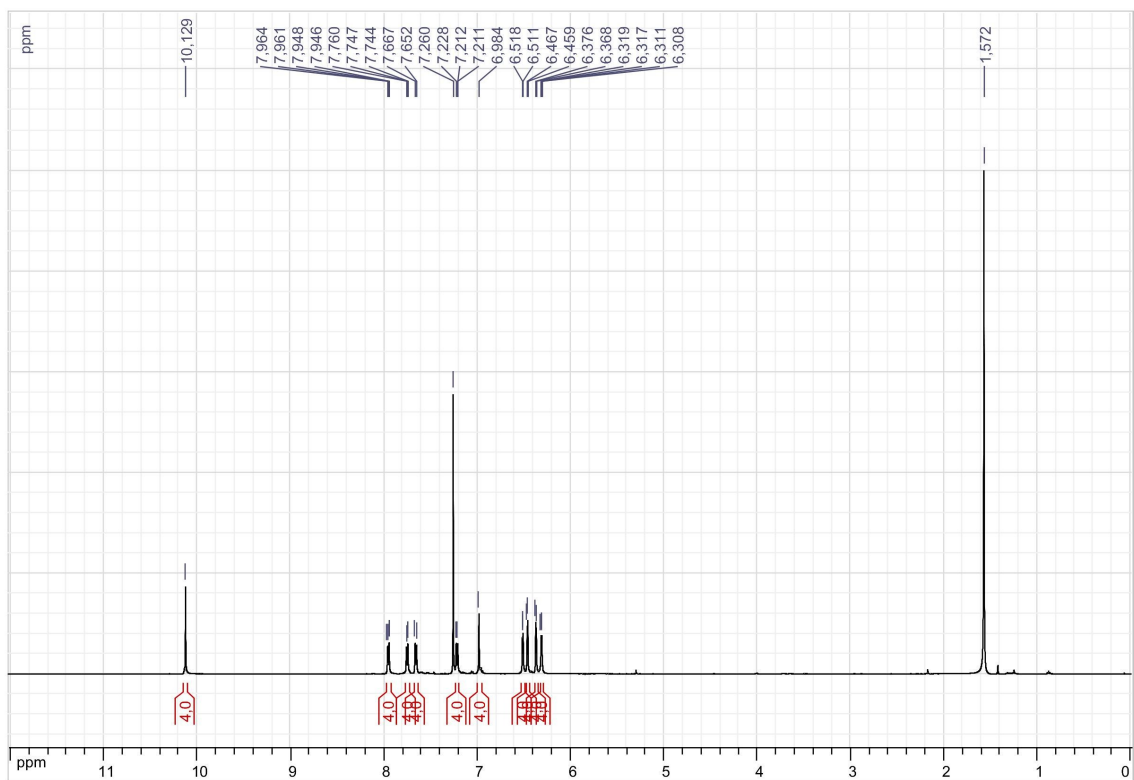

Fig. ESI7  $^1\text{H}$ -NMR spectrum of helicate **1** in  $\text{CDCl}_3$ .

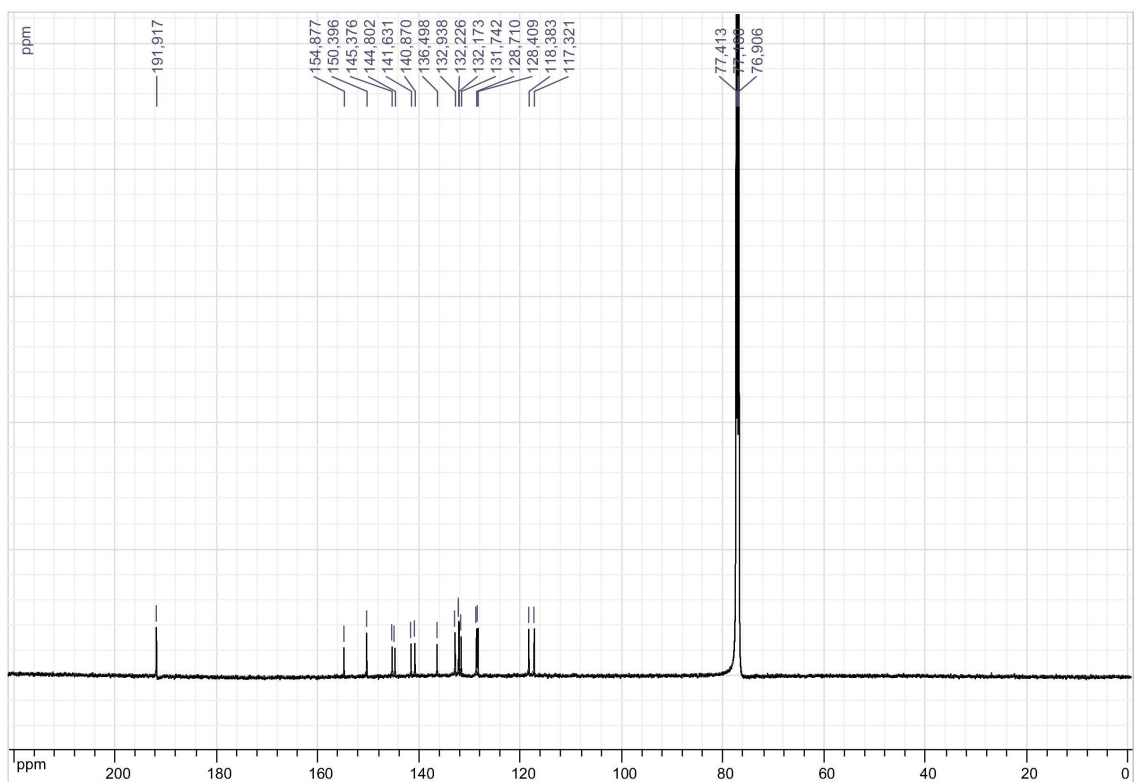

Fig. ESI8  $^{13}\text{C}$ -NMR spectrum of helicate **1** in  $\text{CDCl}_3$ .

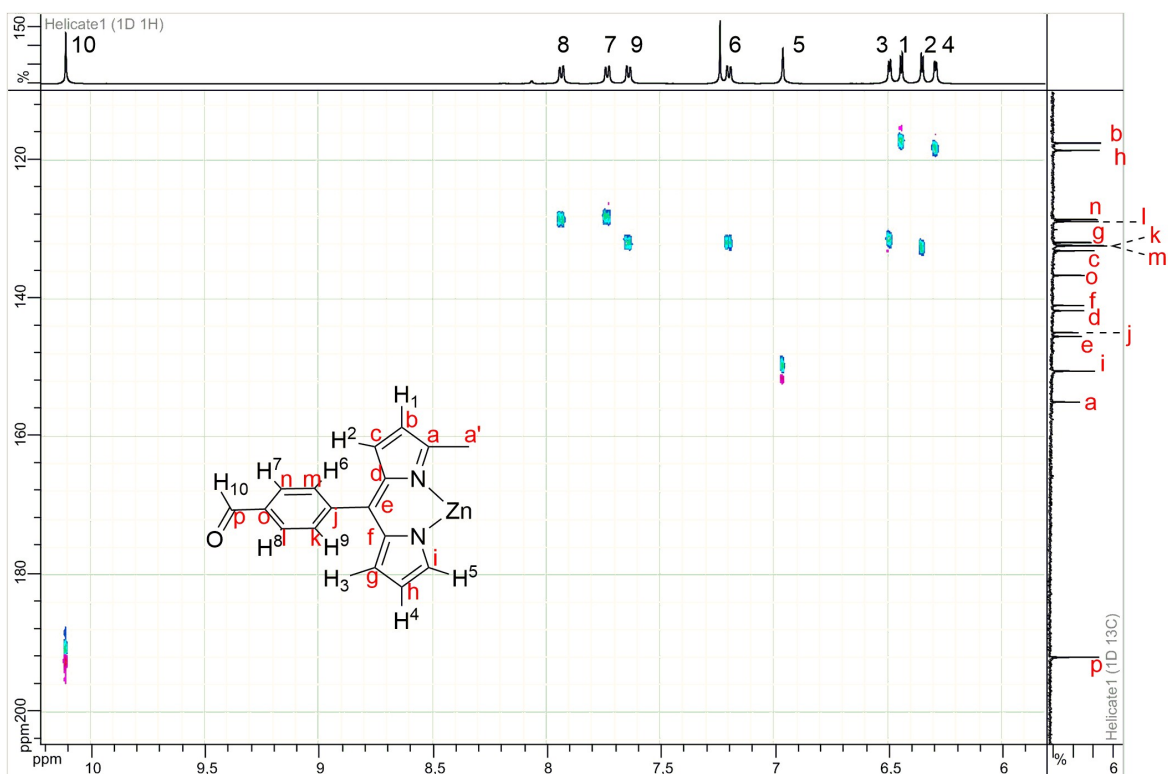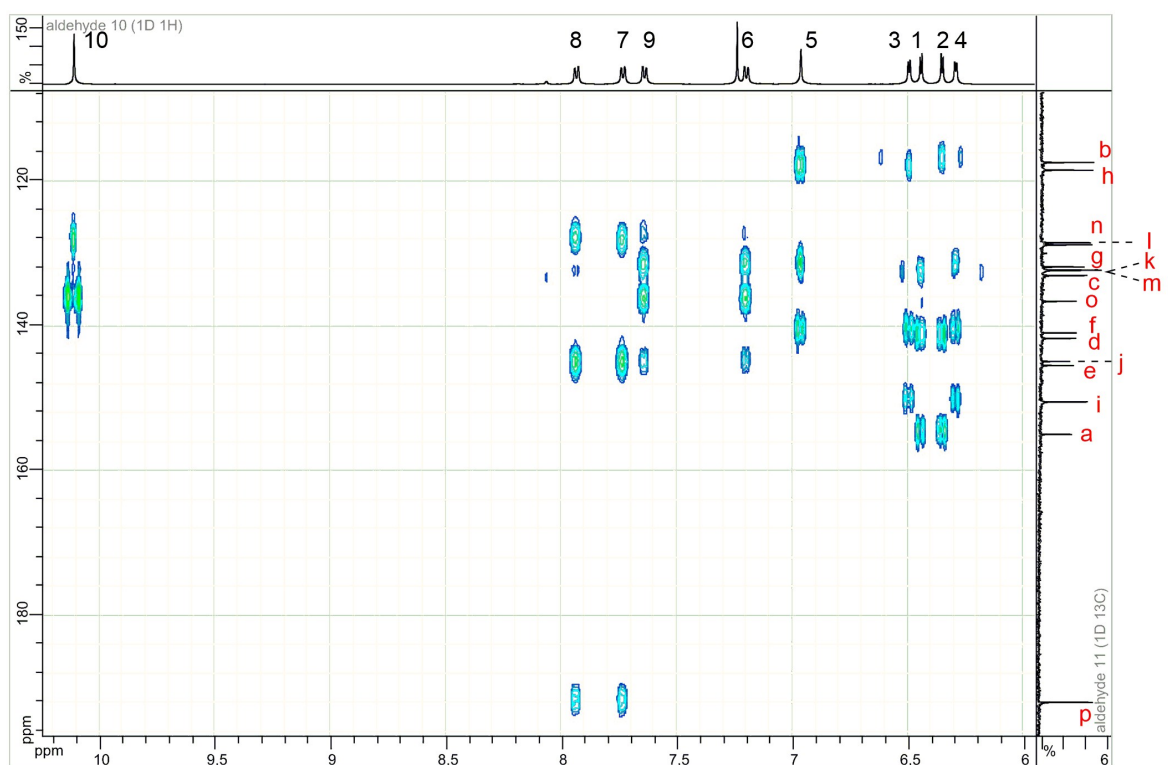

**Fig. ESI 9** HSQC (top) and HMBC (bottom) correlation experiments of helicate **1** in CDCl<sub>3</sub> (500 MHz). The numbering scheme used for the assignment of the proton and carbon atoms of a quarter of the helicate is shown as an insert.



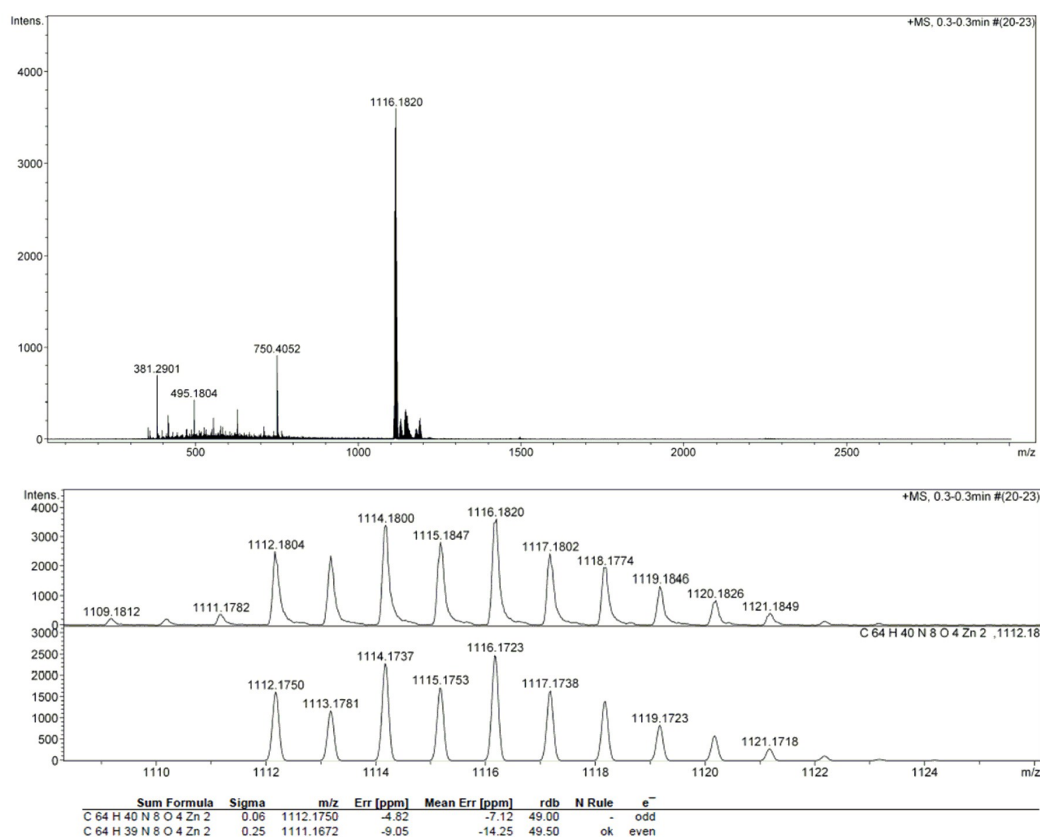

**Fig. ESI10** HRMS spectrum of helicate **1**.

Helicate **5**: To a dry  $\text{CHCl}_3$  (250 mL) solution of helicate **1** (50 mg;  $4.48 \times 10^{-2}$  mmol), a dry  $\text{CHCl}_3$  (250 mL) solution of *m*-xylylenediamine (12.4  $\mu\text{L}$ ;  $9.41 \times 10^{-2}$  mmol, 2 equiv.) and TFA (0.01 equiv) were added under argon. The mixture was stirred at room temperature for 24 hours. It was then evaporated under reduced pressure affording **5** as a dark solid (58 mg, 98%).  $\delta_{\text{H}}$  (500 MHz,  $\text{CDCl}_3$ ) 8.53 (s, 4H, CH=N), 7.92 (d,  $J = 7.5$  Hz, 4H, PhH), 7.59 (d,  $J = 7.5$  Hz, 4H, PhH), 7.54 (d,  $J = 7.5$  Hz, 4H, PhH), 7.44 (s, 2H, PhH), 7.39-7.35 (m, 6H, PhH/pyrroleH), 7.23 (d,  $J = 7.5$  Hz, 4H, PhH), 7.1 (d,  $J = 7.5$  Hz, 4H, PhH), 6.61 (d,  $J = 4.3$  Hz, 4H, pyrroleH), 6.47 (d,  $J = 4.3$  Hz, 4H, pyrroleH), 6.38 (d,  $J = 4.3$  Hz, 4H, pyrroleH), 6.31 (d,  $J = 4.3$  Hz, 4H, pyrroleH), 5.08 (d,  $J = 15.2$  Hz, 4H,  $\text{CH}_2$ ), 4.92 (d,  $J = 15.2$  Hz, 4H,  $\text{CH}_2$ ).  $\delta_{\text{C}}$  (125 MHz,  $\text{CDCl}_3$ ) 162.1, 155.5, 150.1, 146.3, 142.0, 141.7, 141.0, 140.5, 136.7, 133.8, 132.9, 132.4, 131.1, 129.1, 128.2, 125.2, 124.7, 117.7, 117.3, 63.6.  $\lambda_{\text{max}}(\text{CH}_2\text{Cl}_2)/\text{nm}$  ( $\epsilon/\text{mol}^{-1} \text{L cm}^{-1}$ ): 257 (43600), 349 (44400), 431 (56300), 473 (22500), 577 (50200). HRMS (ESI),  $m/z$ :  $[\text{M}]^+$  calcd. for  $\text{C}_{80}\text{H}_{56}\text{N}_{12}\text{Zn}_2$ : 1312.3328, Found 1312.3338.

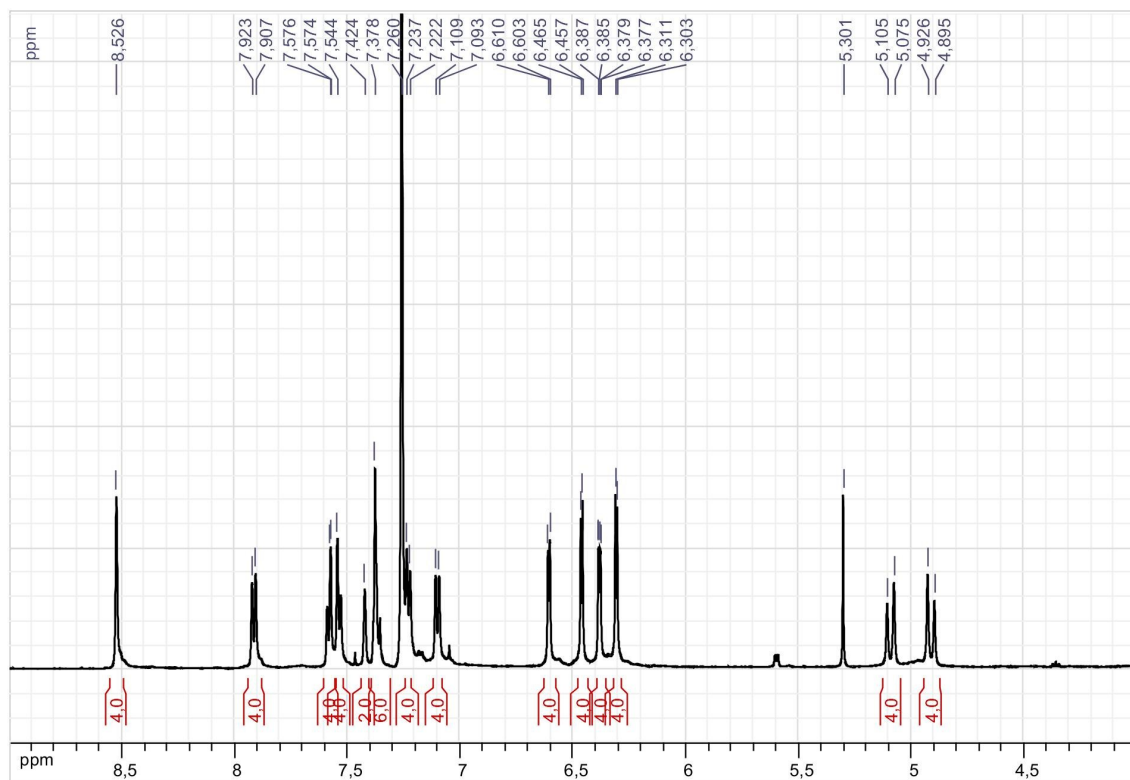

Fig. ESI11  $^1\text{H}$ -NMR spectrum of helicite **5** in  $\text{CDCl}_3$ .

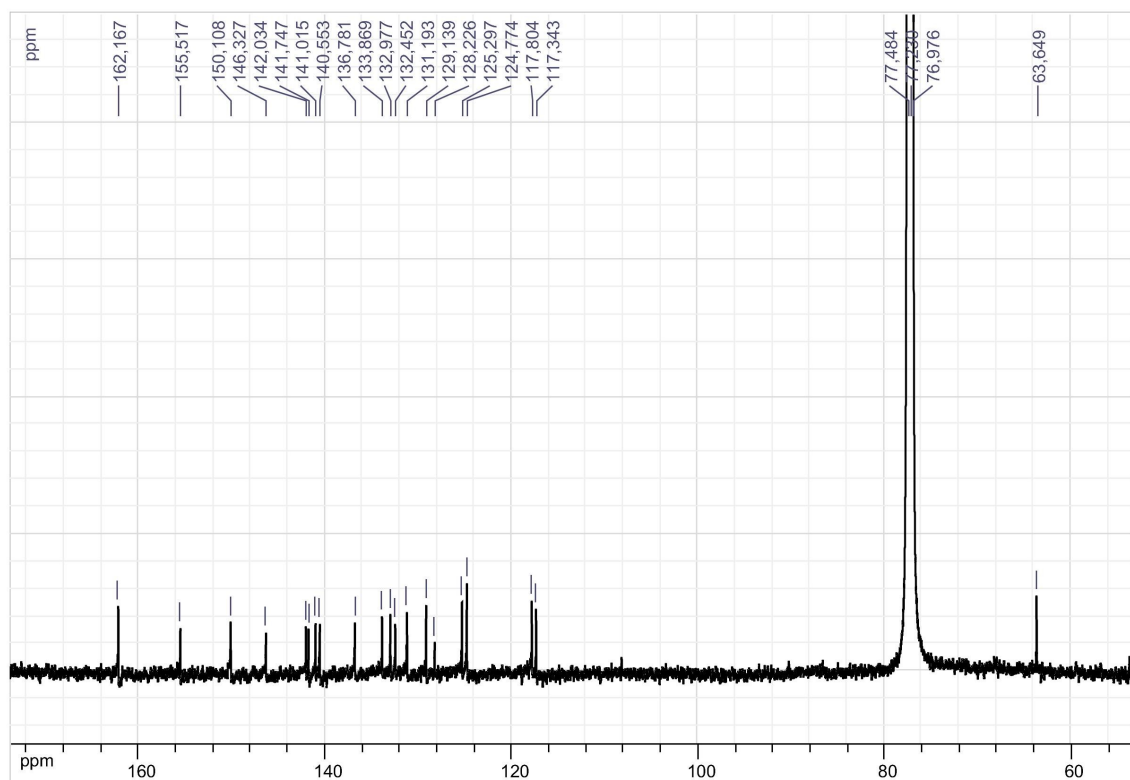

Fig. ESI12  $^{13}\text{C}$ -NMR spectrum of helicite **5** in  $\text{CDCl}_3$ .

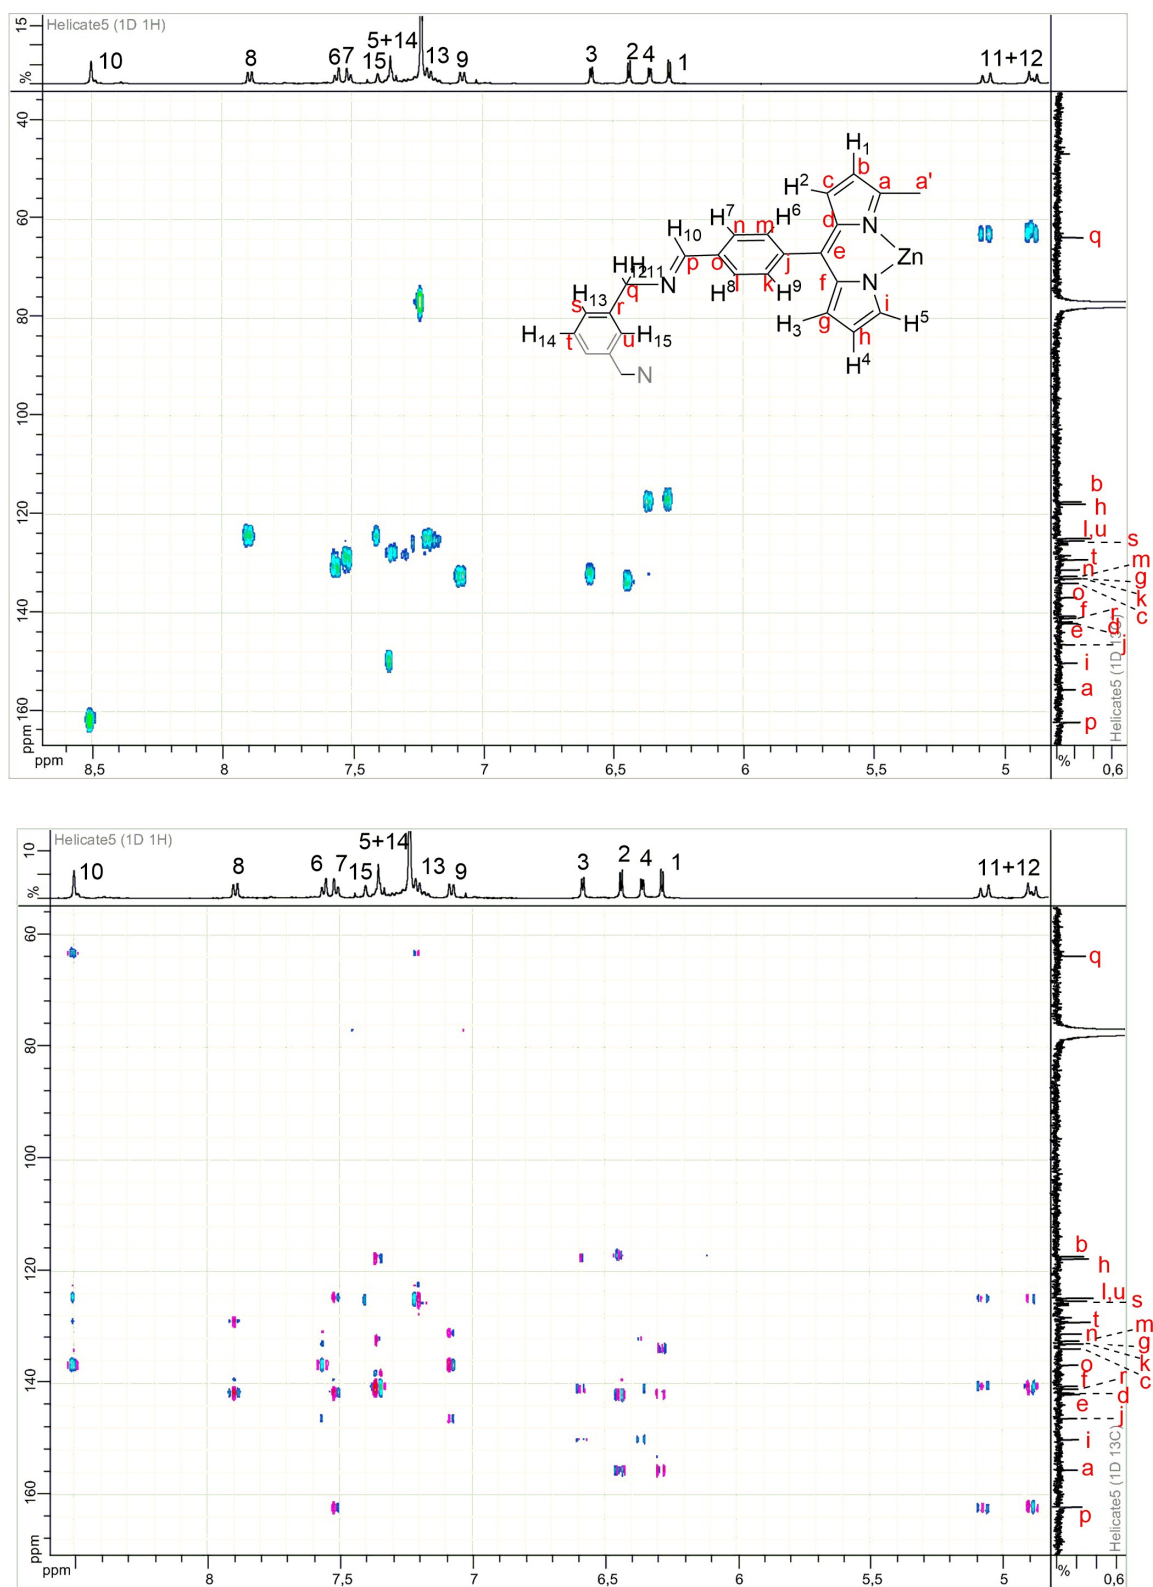

**Fig. ESI 13** HSQC (top) and HMBC (bottom) correlation experiments of helicate **5** in CDCl<sub>3</sub> (500 MHz). The numbering scheme used for the assignment of the proton and carbon atoms of a quarter of the helicate is shown as an insert.

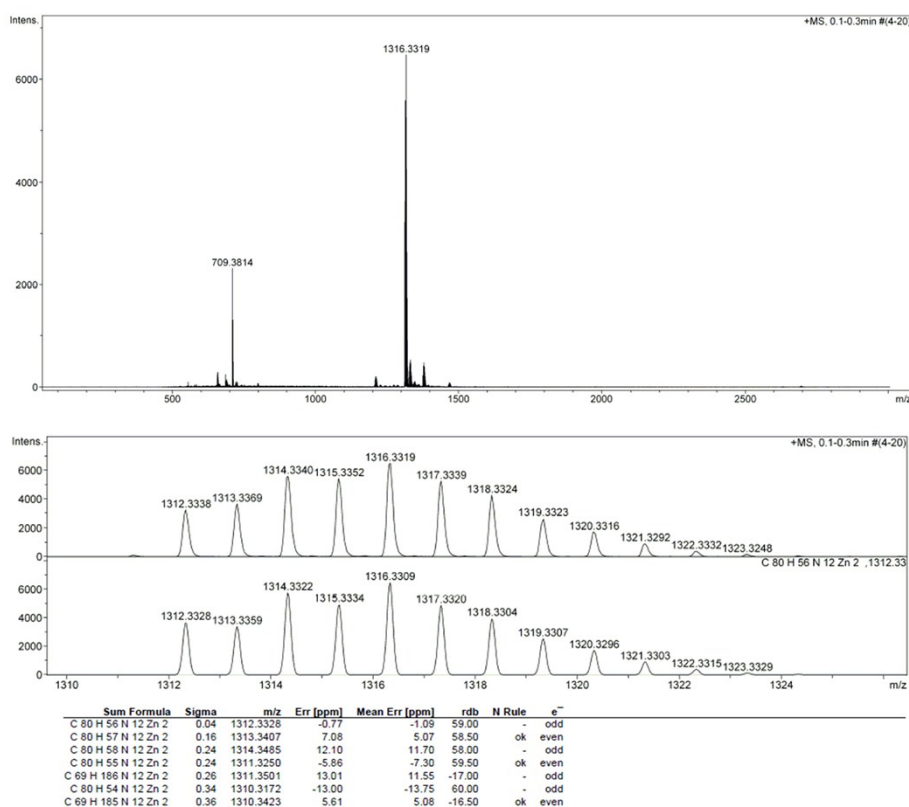

**Fig. ESI14 HRMS spectrum of helicite 5.**

**Helicite 6:** A solution of  $\text{NaBH}_3\text{CN}$  (8 mg, 0.12 mmol, 8eq.) in MeOH (4 mL) was added to a solution of **5** (20 mg, 0.015 mmol, 1eq) in  $\text{CHCl}_3$  (15ml). Then 0.75ml of TFA solution (1.75  $\mu\text{L}$  in 50 mL  $\text{CHCl}_3$ ) was added and the mixture was stirred at room temperature and monitored by H NMR. After 64 hours,  $\text{NaBH}_3\text{CN}$  (8 mg, 0.12 mmol, 8eq) were added, then after 18 additional hours, 0.75mL of TFA solution (1.75  $\mu\text{L}$  in 50 mL  $\text{CHCl}_3$ ) was added and stirring was continued for 5 days. The reaction mixture was diluted with  $\text{CHCl}_3$  and washed with water 3 times. The organic layer was dried on  $\text{Na}_2\text{SO}_4$ , filtered and evaporated under reduced pressure. The residue was purified by two successive column chromatographies ( $\text{SiO}_2$ ,  $\text{CH}_2\text{Cl}_2/\text{MeOH}/\text{TEA}$ : 90/10/4) then ( $\text{SiO}_2$ ,  $\text{CH}_2\text{Cl}_2/\text{MeOH}/\text{TEA}$ : 95/5/1) to give 13 mg of **6** as a mixture with TEA.  $\delta_{\text{H}}$  (300 MHz,  $\text{CD}_2\text{Cl}_2$ ) 7.62 (s, 2H, PhH), 7.46 (m, 4H, PhH), 7.38 (m, 4H, PhH), 7.33 (m, 6H, PhH), 7.44 (m 4H, PhH), 7.07 (m, 8H, PhH/pyrroleH), 6.66 (dd,  $J = 1.0$  and 4.1 Hz, 4H, pyrroleH), 6.35 (d,  $J = 4.1$  Hz, 4H, pyrroleH), 6.30 (dd,  $J = 1.0$  and 4.1 Hz, 4H, pyrroleH), 3.95 (d,  $J = 15.2$  Hz, 4H,  $\text{CH}_2$ ), 3.79 (m, 12H,  $\text{CH}_2$ ). MS (ESI),  $m/z$ :  $[\text{M}]^{2+}$  calcd. for  $\text{C}_{80}\text{H}_{64}\text{N}_{12}\text{Zn}_2$ : 660.19, Found 660.20.

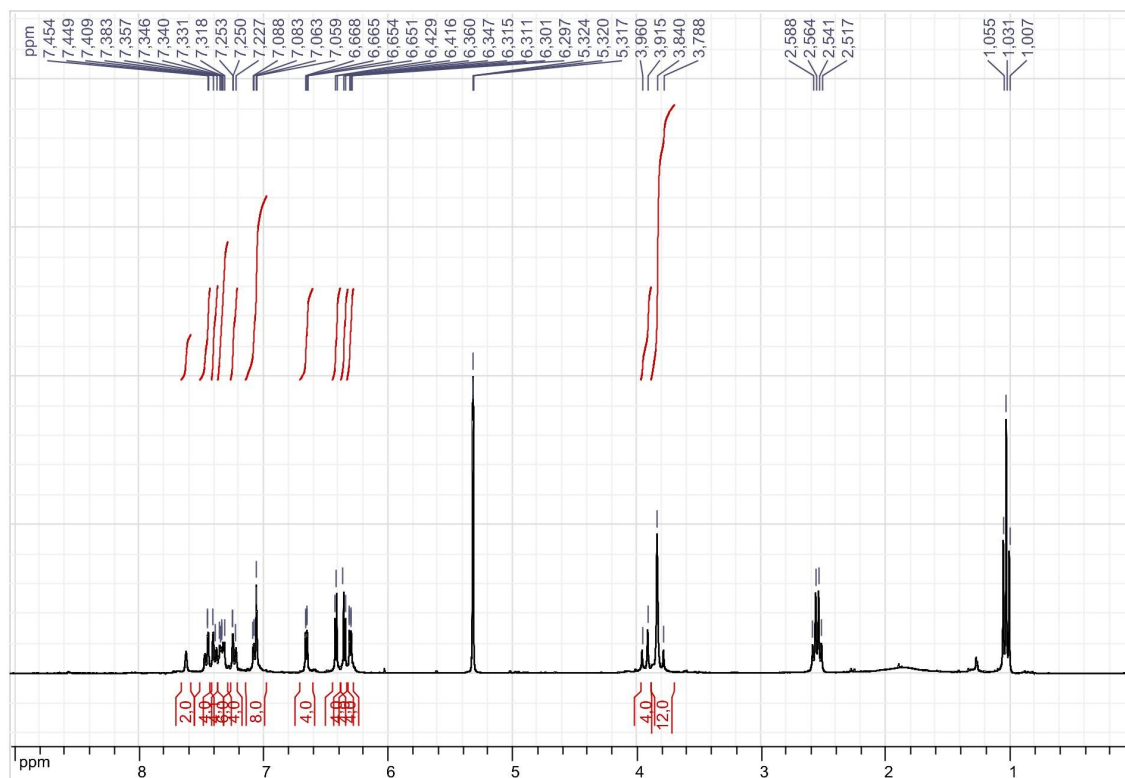

**Fig. ESI15**  $^1\text{H-NMR}$  spectrum of helicate **6** in  $\text{CD}_2\text{Cl}_2$ . Traces of  $\text{NEt}_3$  are present.

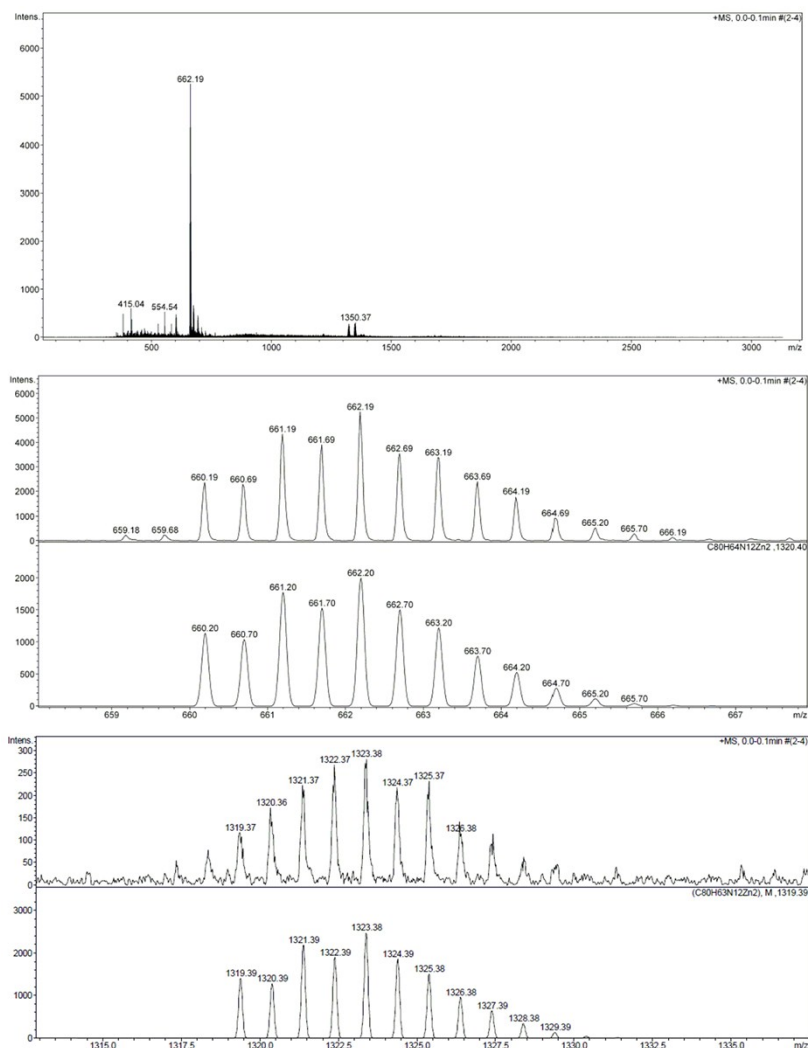

**Fig. ESI16** HRMS spectrum of helicate **6**.

### X-Ray diffraction

Data (Table ESI1) were collected on a Bruker SMART CCD diffractometer with Mo- $K\alpha$  radiation. The structures were solved using SHELXS-97 and refined by full matrix least-squares on  $F^2$  using SHELXL-2014 with anisotropic thermal parameters for all non-hydrogen atoms.<sup>2</sup> Hydrogen atoms were introduced at calculated positions and not refined (riding model). In the structure of **4**(CHCl<sub>3</sub>), the chloroform molecule is disordered over two positions that have been modelled accordingly.

CCDC 1893175-1893178 contain the supplementary crystallographic data for compounds **1-4**. These data can be obtained free of charge via [www.ccdc.cam.ac.uk/data\\_request/cif](http://www.ccdc.cam.ac.uk/data_request/cif).

**Table ESI1.** Crystallographic data for compounds **1-4**.

|                                                                 | <b>1</b>                                                                      | <b>2</b>                                                        | <b>3</b>                                                        | <b>4 (CHCl<sub>3</sub>)</b>                                                   |
|-----------------------------------------------------------------|-------------------------------------------------------------------------------|-----------------------------------------------------------------|-----------------------------------------------------------------|-------------------------------------------------------------------------------|
| Formula                                                         | C <sub>64</sub> H <sub>40</sub> N <sub>8</sub> O <sub>4</sub> Zn <sub>2</sub> | C <sub>32</sub> H <sub>22</sub> N <sub>4</sub> NiO <sub>2</sub> | C <sub>32</sub> H <sub>20</sub> N <sub>4</sub> NiO <sub>2</sub> | C <sub>33</sub> H <sub>23</sub> Cl <sub>3</sub> N <sub>4</sub> O <sub>2</sub> |
| FW                                                              | 1115.78                                                                       | 553.24                                                          | 551.23                                                          | 613.90                                                                        |
| Crystal system                                                  | Tetragonal                                                                    | Triclinic                                                       | Triclinic                                                       | Monoclinic                                                                    |
| Space group                                                     | <i>P</i> -4 <i>n</i> 2                                                        | <i>P</i> -1                                                     | <i>P</i> -1                                                     | <i>P</i> 2 <sub>1</sub> / <i>n</i>                                            |
| <i>a</i> / Å                                                    | 11.9527(3)                                                                    | 9.7819(2)                                                       | 9.8321(3)                                                       | 11.4063(4)                                                                    |
| <i>b</i> / Å                                                    | 11.9527(3)                                                                    | 11.6608(3)                                                      | 10.7832(3)                                                      | 9.7778(3)                                                                     |
| <i>c</i> / Å                                                    | 17.7035(7)                                                                    | 12.9613(3)                                                      | 13.3416(3)                                                      | 13.4576(4)                                                                    |
| <i>α</i> / °                                                    |                                                                               | 110.8970(10)                                                    | 103.1690(10)                                                    |                                                                               |
| <i>β</i> / °                                                    |                                                                               | 98.8930(10)                                                     | 102.6240(10)                                                    | 94.7850(10)                                                                   |
| <i>γ</i> / °                                                    |                                                                               | 111.0520(10)                                                    | 111.8220(10)                                                    |                                                                               |
| <i>V</i> / Å <sup>3</sup>                                       | 2529.25(16)                                                                   | 1219.34(5)                                                      | 1204.51(6)                                                      | 1495.67(8)                                                                    |
| <i>Z</i>                                                        | 2                                                                             | 2                                                               | 2                                                               | 2                                                                             |
| <i>T</i> / K                                                    | 173(2)                                                                        | 173(2)                                                          | 173(2)                                                          | 173(2)                                                                        |
| <i>μ</i> / mm <sup>-1</sup>                                     | 1.010                                                                         | 0.836                                                           | 0.846                                                           | 0.344                                                                         |
| Refls. coll.                                                    | 40519                                                                         | 24117                                                           | 23901                                                           | 28945                                                                         |
| Ind. refls. ( <i>R</i> <sub>int</sub> )                         | 3750 (0.0574)                                                                 | 6572 (0.0251)                                                   | 6497 (0.0408)                                                   | 4084 (0.0233)                                                                 |
| <i>R</i> <sub>1</sub> ( <i>I</i> >2σ( <i>I</i> )) <sup>a</sup>  | 0.0532                                                                        | 0.0326                                                          | 0.0416                                                          | 0.0701                                                                        |
| <i>wR</i> <sub>2</sub> ( <i>I</i> >2σ( <i>I</i> )) <sup>a</sup> | 0.1285                                                                        | 0.0768                                                          | 0.0946                                                          | 0.1929                                                                        |
| <i>R</i> <sub>1</sub> (all data) <sup>a</sup>                   | 0.0809                                                                        | 0.0396                                                          | 0.0628                                                          | 0.0802                                                                        |
| <i>wR</i> <sub>2</sub> (all data) <sup>a</sup>                  | 0.1443                                                                        | 0.0800                                                          | 0.1051                                                          | 0.2026                                                                        |
| <i>GOF</i>                                                      | 1.050                                                                         | 1.053                                                           | 1.030                                                           | 1.039                                                                         |

$$^a R_1 = \sum ||F_o| - |F_c|| / \sum |F_o|; wR_2 = [\sum w(F_o^2 - F_c^2)^2 / \sum wF_o^4]^{1/2}$$

## References

- (a) L. Yu, K. Muthukumar, I. V. Sazanovich, C. Kirmaier, E. Hindin, J. R. Diers, P. D. Boyle, D. F. Bocian, D. Holten and J. S. Lindsey, *Inorg. Chem.*, 2003, **42**, 6629. (b) K. Muthukumar, S. H. H. Zaidi, L. Yu, P. Thamyongkit, M. E. Calder, D. S. Sharada and J. S. Lindsey, *J. Porphyrins Phthalocyanines*, 2005, **9**, 745.
- G. M. Sheldrick, *Acta Cryst. C*, 2015, **71**, 3.
